# Supplementary material for: ESTs and EST-linked polymorphisms for genetic mapping and phylogenetic reconstruction in the guppy, Poecilia reticulata
Source: PubMed Central journal article supplement (PMC1994688; doi:10.1186/1471-2164-8-269), 2007-08-08
Supplement: 1471-2164-8-269-S2.pdf [file 1471-2164-8-269-S2.pdf]

**Additional Table 1.** Accession numbers\* of nuclear genes used for Teleost phylogeny including guppy

| Gene                        | Species               |                       |                       |                       |                             |                       |                       |                           |                        |                                         |
|-----------------------------|-----------------------|-----------------------|-----------------------|-----------------------|-----------------------------|-----------------------|-----------------------|---------------------------|------------------------|-----------------------------------------|
|                             | Fundulus              | Medaka                | Gasterosteus          | Tetraodon             | Fugu                        | Trout                 | Salmon                | Gallus                    | Zebrafish              | Guppy (cDNA/Acc.Nr.)                    |
| EF 1 alpha                  | AY430091.1<br>GenBank | AB013606.1<br>GenBank | CD506955.1<br>GenBank | GSCT<br>00011211001   | GENSCANSLICE<br>00000025408 | CF752834.1<br>GenBank | AF321836.1<br>GenBank | NM_204157.2<br>GenBank    | ENSDART<br>00000023156 | Oro_Skin_3_I03<br>GenBank: EF408829     |
| cyclin G1                   | DN957128.1<br>GenBank | BJ885147.1<br>GenBank | DT969609.1<br>GenBank | GSTENT<br>00017018001 | NEWSINFRUT<br>00000173819   | BX870371.3<br>GenBank | AM083796.1<br>GenBank | BX935990.2<br>GenBank     | AY423016.1<br>GenBank  | Tra_Embryo_14_L05<br>GenBank: EF408837  |
| Heat Shock Cognate          | CV819660.1<br>GenBank | BJ715323.1<br>GenBank | DW622253.1<br>GenBank | CR699773.2<br>GenBank | NEWSINFRUT<br>00000149686   | CF752396.1<br>GenBank | DY703130.1<br>GenBank | AJ004940.1<br>GenBank     | ENSDART<br>00000063864 | Qua_Embryo_U5_O15<br>GenBank: EF408831  |
| Lactate Dehydrogenase B     | M33969.1<br>GenBank   | BJ728879.1<br>GenBank | DN717250.1<br>GenBank | GWSHT<br>00003443001  | NEWSINFRUT<br>00000160007   | BX079778.2<br>GenBank | DW581686.1<br>GenBank | NM_204177.1<br>GenBank    | ENSDART<br>00000010777 | Blu_Testis_3_H19<br>GenBank: EF408825   |
| phosphoglycerate Kinase     | CN985009.1<br>GenBank | AB111386.1<br>GenBank | DN680833.1<br>GenBank | CR682765.2<br>GenBank | NEWSINFRUT<br>00000160355   | CA356380.1<br>GenBank | DY709316.1<br>GenBank | NM_204985.1<br>GenBank    | ENSDART<br>00000076333 | Blu_Testis_7_N09<br>GenBank: EF408827   |
| ribosomal P. L27            | CN981470.1<br>GenBank | AV669486.1<br>GenBank | DW032853.1<br>GenBank | GSTENT<br>00021244001 | NEWSINFRUT<br>00000137482   | CA341841.1<br>GenBank | BU965625.1<br>GenBank | NM_205337.1<br>GenBank    | ENSDART<br>00000020311 | Tra_Embryo_4-3_A01<br>GenBank: EF408835 |
| ribosomal P. L7             | CN978636.1<br>GenBank | BJ895217.1<br>GenBank | DN729533.1<br>GenBank | CR680002.2<br>GenBank | NEWSINFRUT<br>00000133890   | CA385201.1<br>GenBank | DW536733.1<br>GenBank | NM_001006345.1<br>GenBank | ENSDART<br>00000019149 | Is_Skin_2_G06<br>GenBank: EF408834      |
| ribosomal P. S15            | CN991454.1<br>GenBank | BJ495529.1<br>GenBank | DN672832.1<br>GenBank | GSTENT<br>00020904001 | NEWSINFRUT<br>00000146235   | CA347051.1<br>GenBank | DW539978.1<br>GenBank | NM_205462.1<br>GenBank    | ENSDART<br>00000066146 | Oro_Skin_5_B04<br>GenBank: EF408830     |
| ribosomal P. S6             | CN980370.1<br>GenBank | BJ016476.1<br>GenBank | CD493077.1<br>GenBank | CR661743.2<br>GenBank | NEWSINFRUT<br>00000141607   | CA365709.1<br>GenBank | CA057133.1<br>GenBank | NM_205225.1<br>GenBank    | FGENESH<br>00000072054 | Oro_Retina_2_H03<br>GenBank: EF408828   |
| triosephosphate Isomerase B | CV816996.1<br>GenBank | BJ727505.1<br>GenBank | DN654949.1<br>GenBank | GSTENT<br>00005289001 | NEWSINFRUT<br>00000156180   | CF752393.1<br>GenBank | DW566697.1<br>GenBank | NM_205451.1<br>GenBank    | ENSDART<br>00000060056 | Qua_Embro_6-3_H08<br>GenBank: EF408833  |

Species listed in the first line are as explained in legend of additional Figure 1.

\* Accession numbers refer to GenBank where indicated, all others are from the Ensembl Genome Browser

[<http://www.ensembl.org/>].
